# Supplementary material for: CRISPR repeat sequences and relative spacing specify DNA integration by Pyrococcus furiosus Cas1 and Cas2
Source: PubMed Central journal article supplement — Nucleic Acids Res. 2019 Jun 20;47(14):7518–31. doi: 10.1093/nar/gkz548 (PMC6698737; doi:10.1093/nar/gkz548), 2019-06-20
Supplement: gkz548_supplemental_file.pdf [file gkz548_supplemental_file.pdf]

**Supplementary Material for**  
**CRISPR repeat sequences and relative spacing specify DNA**  
**integration by *Pyrococcus furiosus* Cas1 and Cas2**

Julie Grainy, Sandra Garrett, Brenton Graveley, Michael Terns

## Supplementary Figure S1.

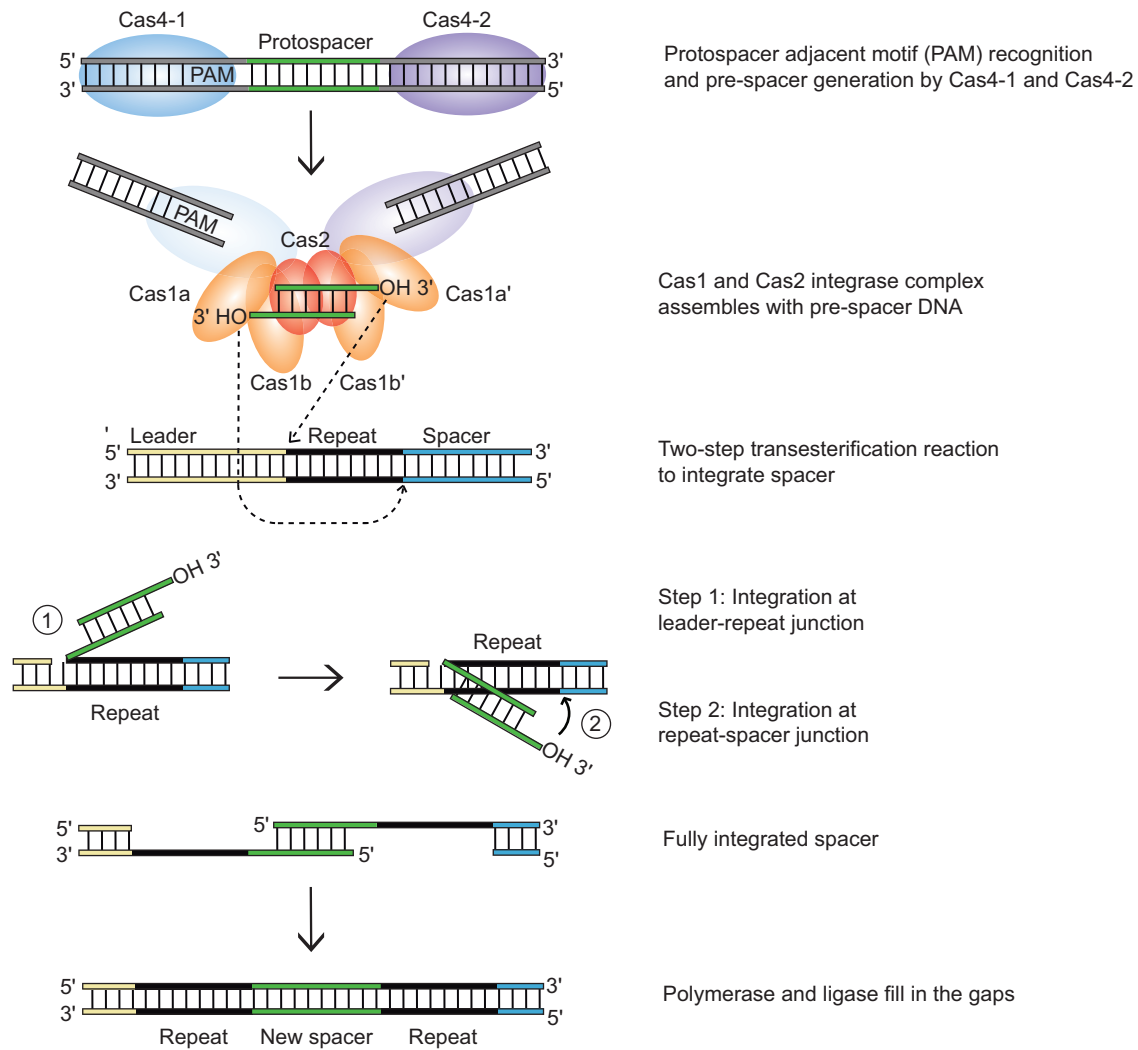

**Figure S1. CRISPR adaptation model for *Pyrococcus furiosus*.**

Cas4-1 and Cas4-2 generate pre-spacers, which Cas1 and Cas2 then integrate into the CRISPR array by a two-step transesterification reaction at the borders of the leader-proximal repeat. The order of the two integration steps is unknown for this system.

## Supplementary Figure S2.

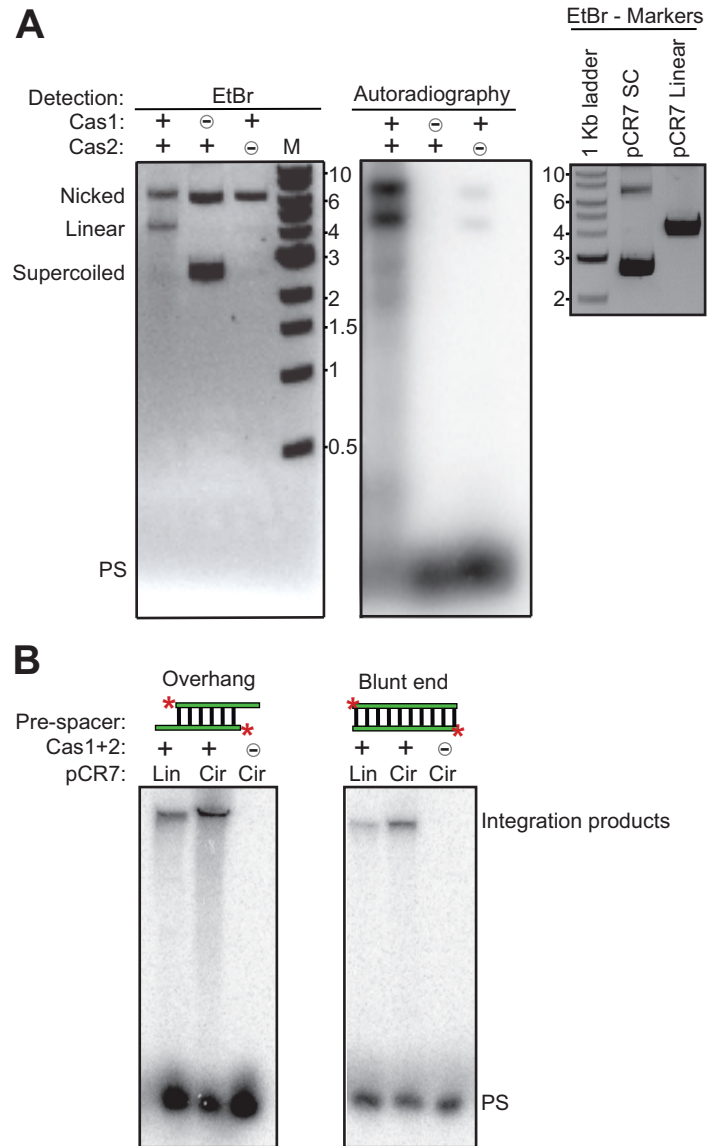

**Figure S2. Cas2 is required for robust spacer integration**

(A) Integration assay comparing Cas1+2, Cas2 alone, and Cas1 alone. Experimental conditions were the same as described for Figure 1. (B) Integration assay comparing pre-spacers with five nucleotide long 3' overhangs and pre-spacers with blunt ends. Linear and circular pCR7 substrates were both tested as the target DNA. Reaction products were separated on 10% denaturing PAGE, followed by autoradiography.

## Supplementary Figure S3.

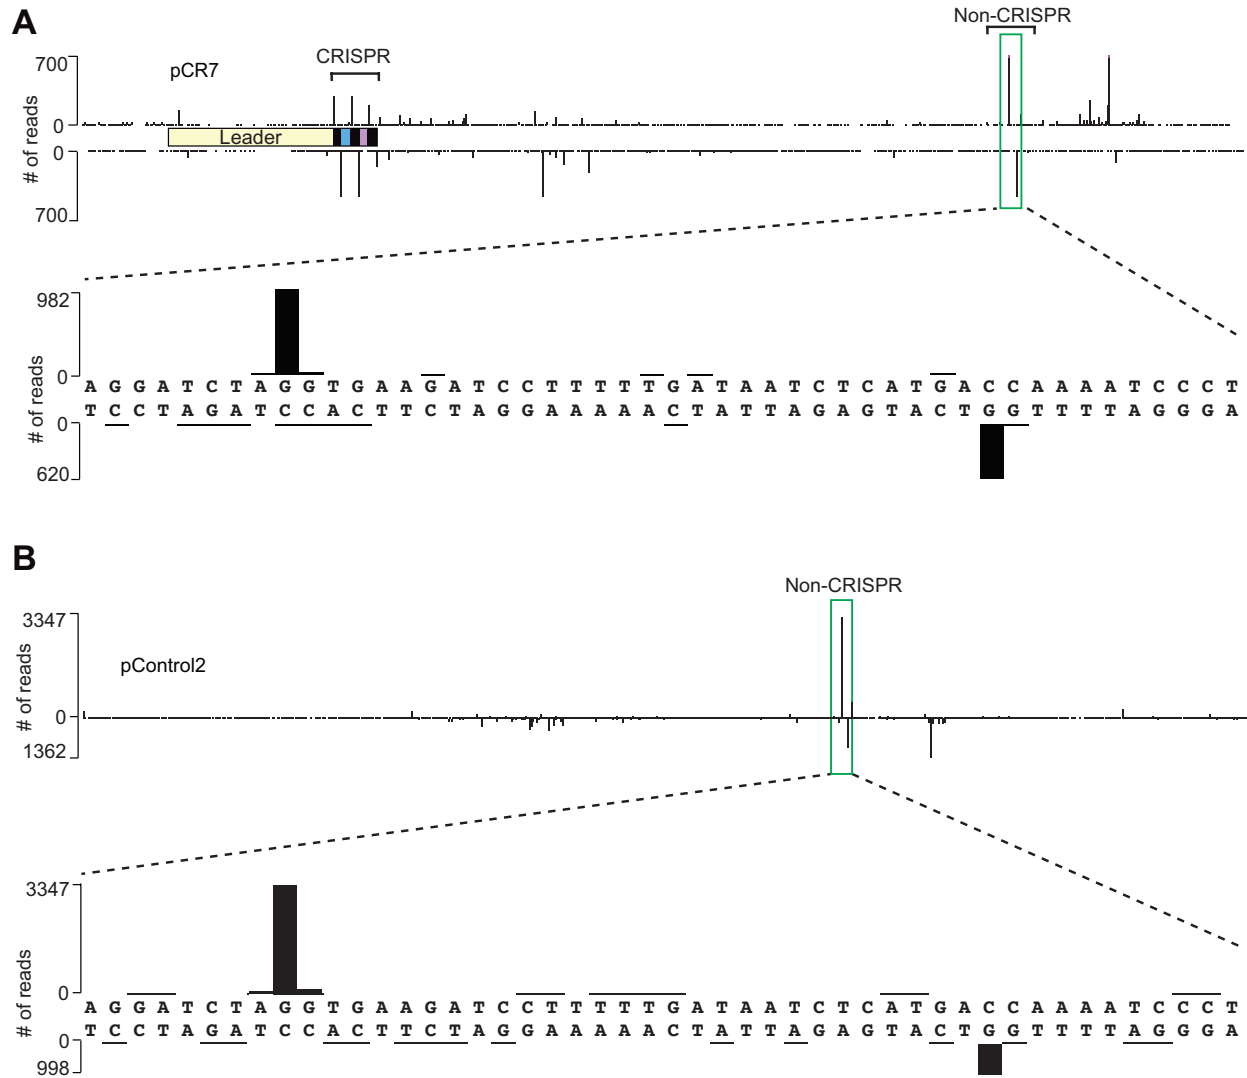

### Figure S3. Non-CRISPR integration site

(A) Integration locations on pCR7. Increased resolution of the highly preferred non-CRISPR integration site (boxed in green) displayed below. (B) Integration locations on pControl2, an alternative plasmid with a different backbone from pCR7. Increased resolution of the same highly preferred non-CRISPR integration site (boxed in green) displayed below. pCR7 and pControl2 share a 120 bp conserved region, in which this preferred site is located, while the rest of the plasmid backbones are not conserved.

## Supplementary Figure S4.

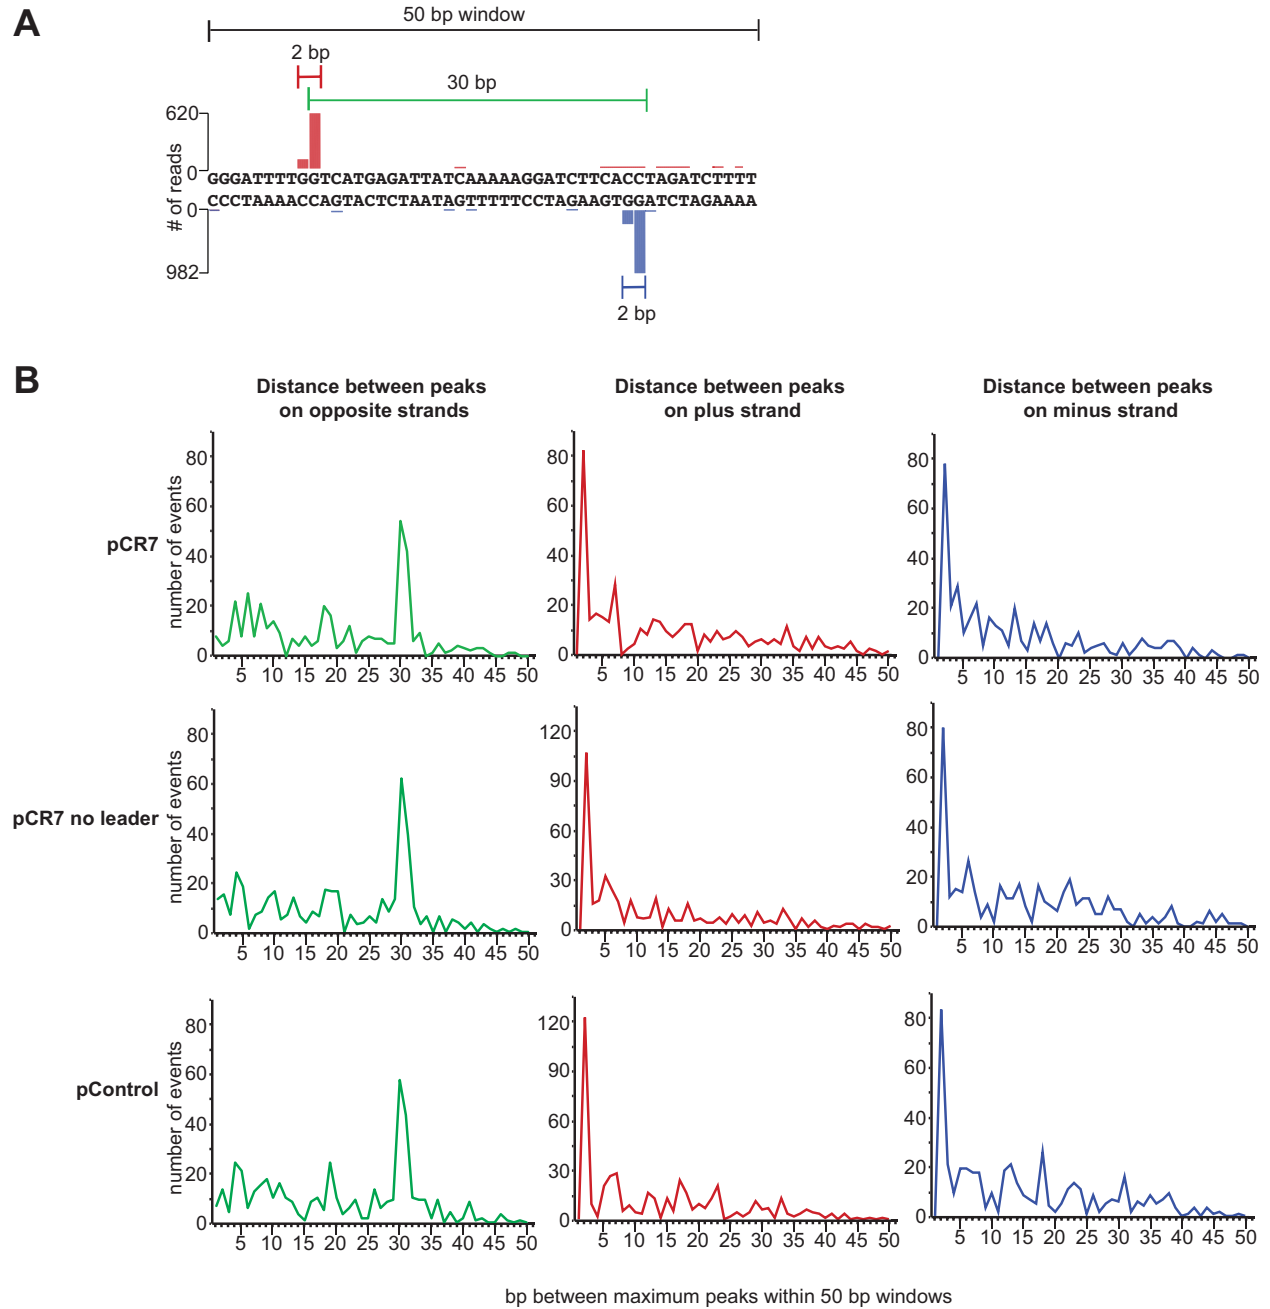

**Figure S4. Spacing of integration peaks**

(A) Spacing between maximum integration peaks within a 50 bp window was measured across the entire plasmid by making 500 random windows. Distance was measured three ways: Highest plus strand peak to highest minus strand peak (green), two highest plus strand peaks (red), and two highest minus strand peaks (blue). (B) Peaks on opposite strands (green), plus strand (red), and minus strand (blue) were compared by counting the number of times each bp spacing between highest peaks was found in the 500 random windows.

## Supplementary Figure S5.

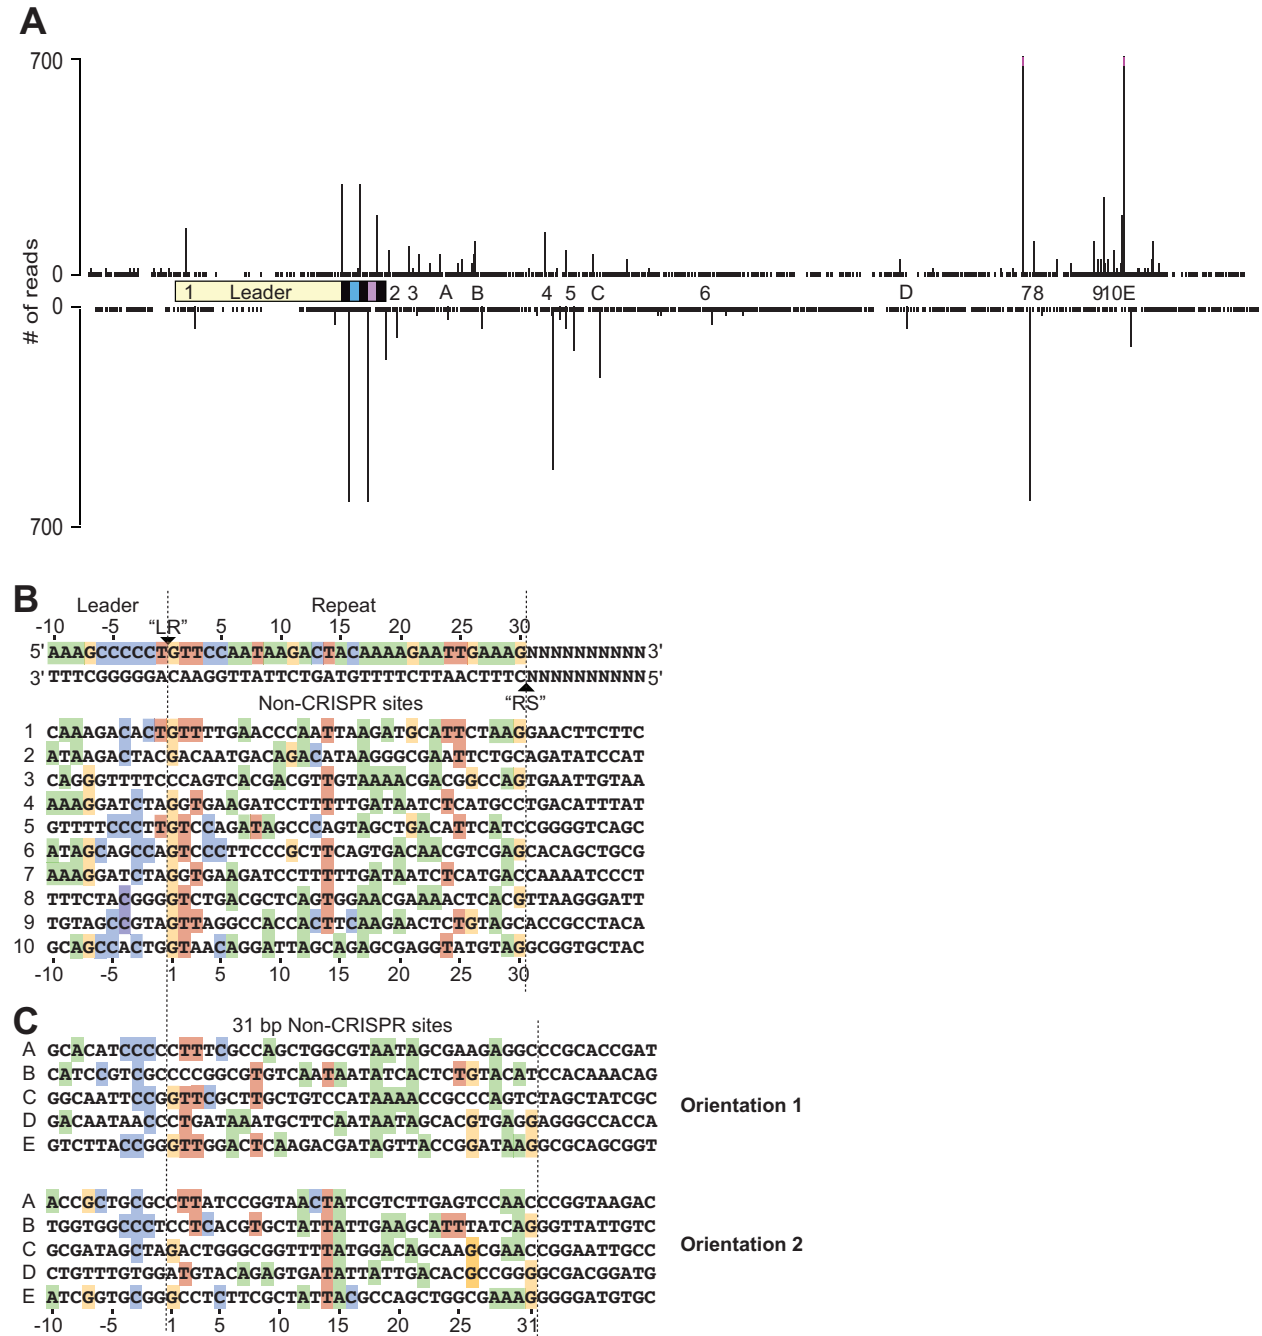

**Figure S5. Non-CRISPR integration sites on pCR7**

(A) Integration sites along pCR7, with top ten 30 bp non-CRISPR sites marked 1 through 10. Highly integrated sites that were 31 bp are marked A through E. (B, C) Sequences of 30 bp (B) and 31 bp (C) non-CRISPR sites with corresponding numbers and letters mapping to the track above. Homology with the WT repeat is highlighted for each sequence. The 31 bp sequences are displayed in both orientations, in order to show homology with WT repeat from both sites of integration in the +1 position.

# Supplementary Figure S6.

**A**

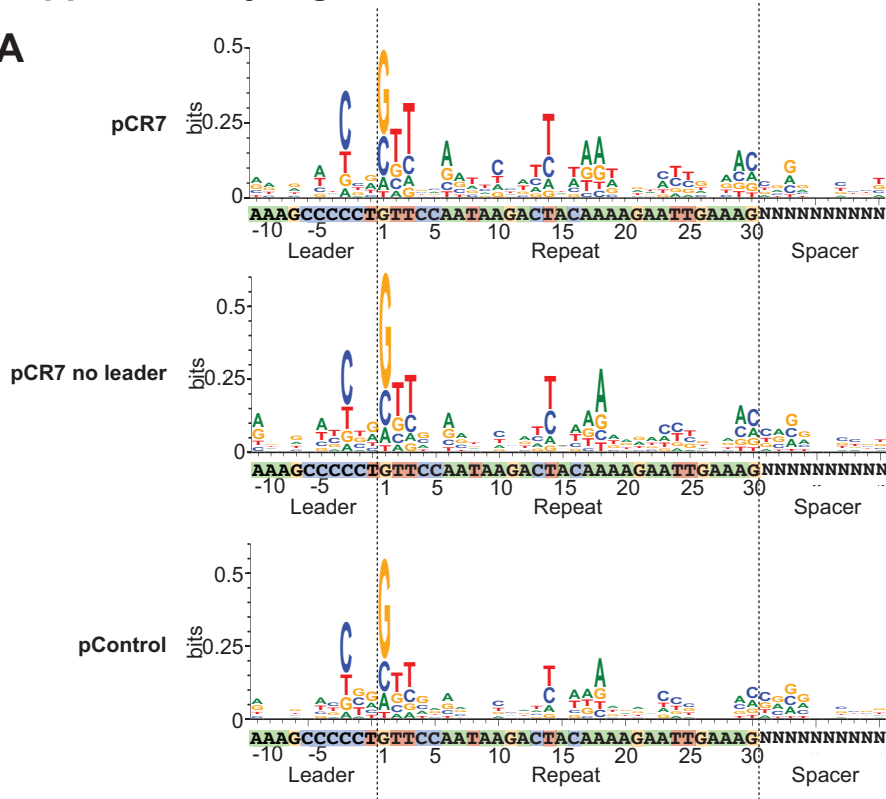

**B**

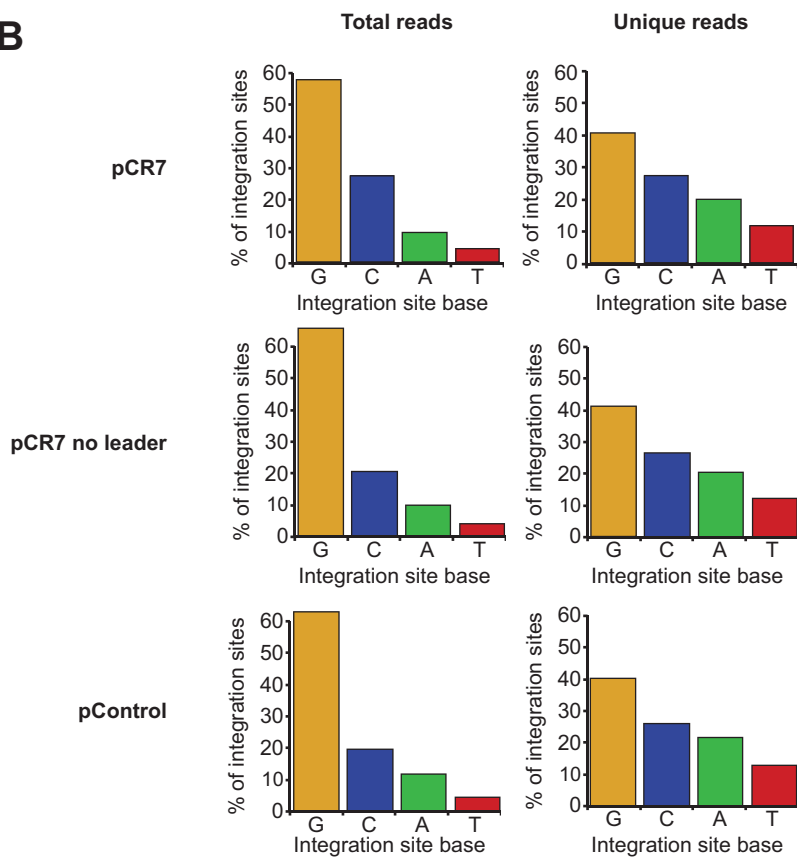

**Figure S6. WebLogos and base preferences of all integration sites**

(A) WebLogos of all integration locations. (B) Percent of total or unique integration sites that were located at guanine, cytosine, adenine, and thymine. Many positions in the plasmid had multiple reads showing spacer integration at that point; for “total reads” the base at the integration point was counted once for each supporting read. For “unique reads” the base at a distinct position was counted only once if one or more reads showed integration at that point.



## Supplementary Figure S7.

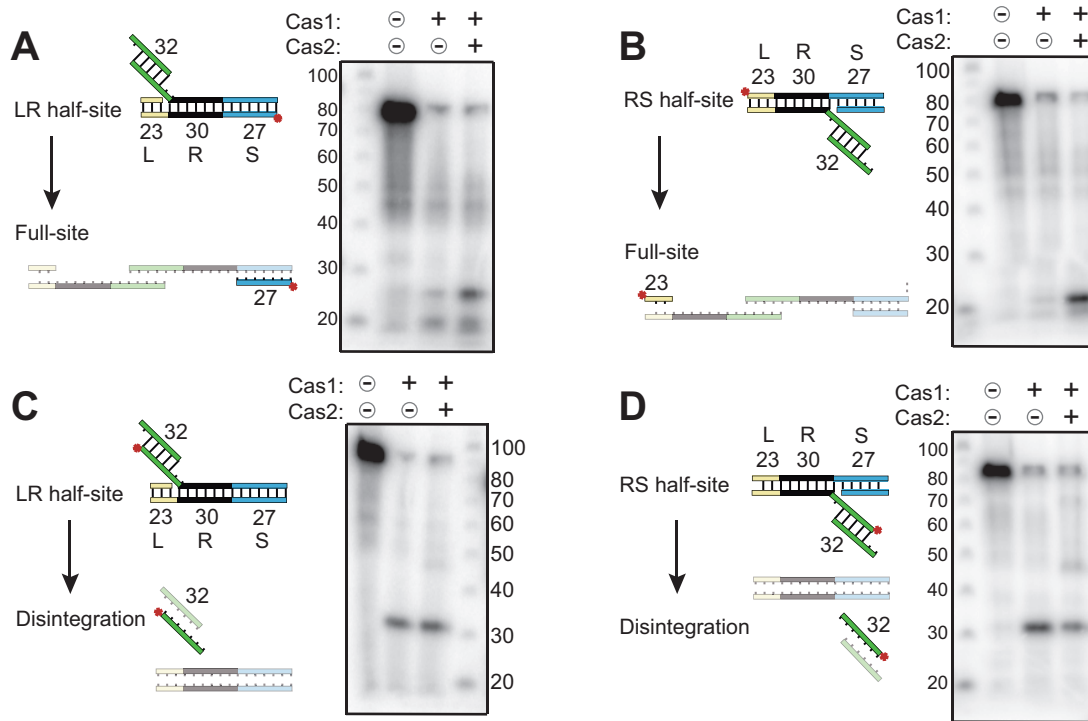

**Figure S7. Full-site integration occurs with Cas1 and Cas2, while disintegration is achieved by Cas1 alone.** (A, B) Continuation of LR half-site (A) or RS half-site (B) substrates to full-site integration detected with radiolabel on bottom strand of the spacer (A) or top strand of leader (B). Reactions contain no protein, Cas1, or Cas1 and Cas2. (C, D) Spacer disintegration from LR (C) or RS (D) half-site substrates detected with radiolabel on spacer. Reactions contain no protein, Cas1, or Cas1 and Cas2.

## Supplementary Figure S8.

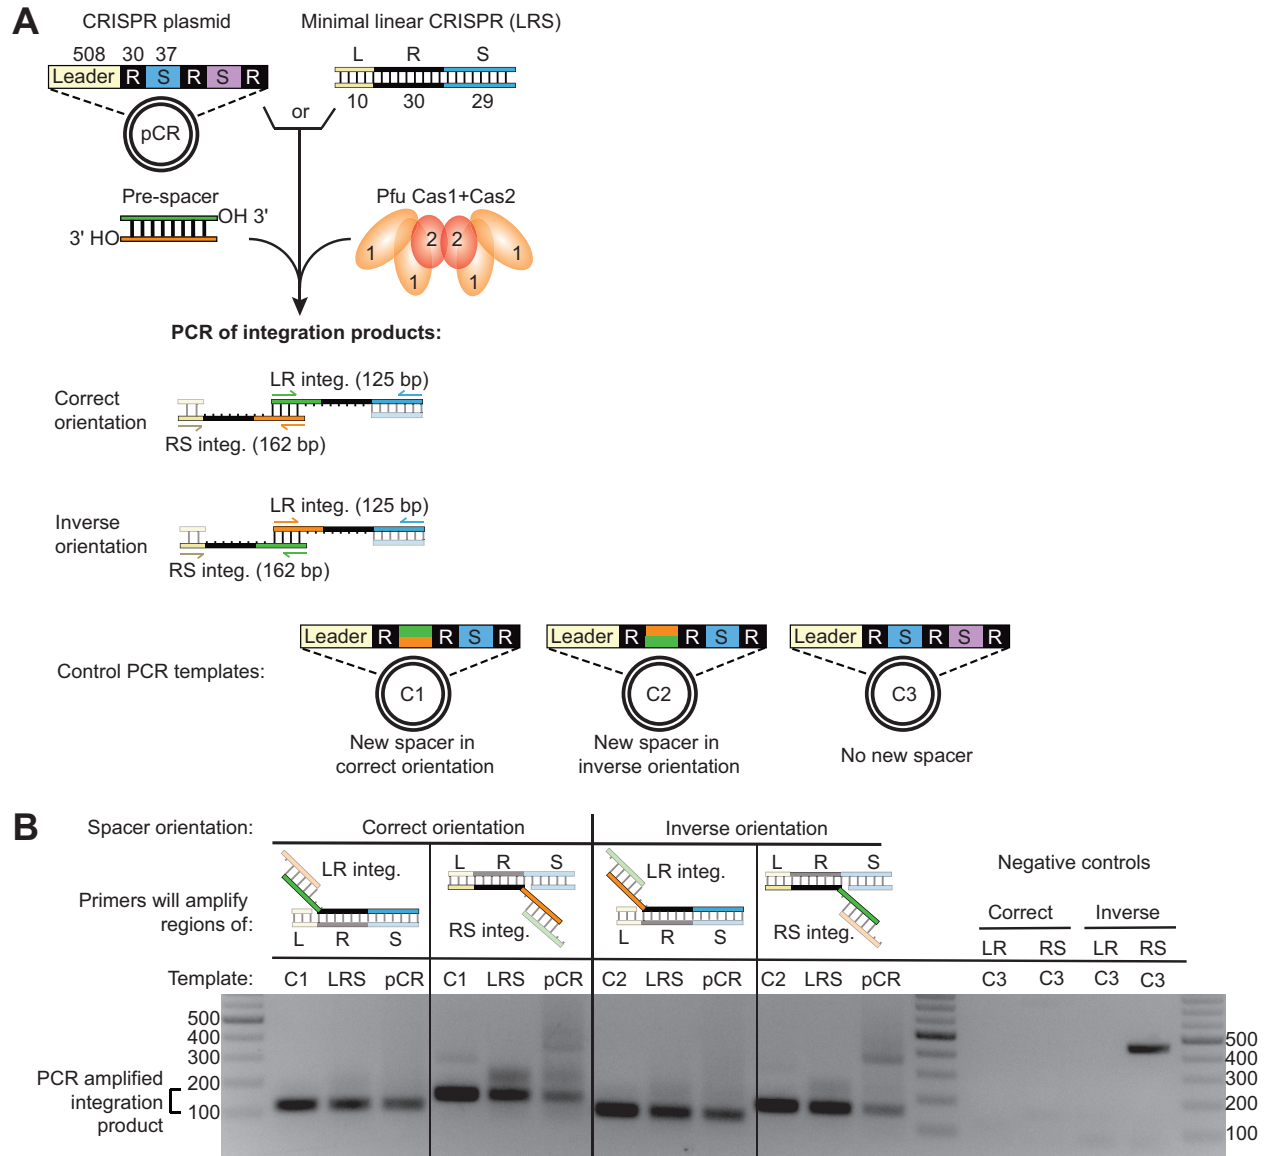

**Figure S8. PCR of integration sites determine pre-spacers are integrated in both correct and inverse orientations.** (A) Spacer integration assays were performed with either CRISPR plasmid (pCR) or minimal linear CRISPRs (LRS). Integration products were used as templates for the following PCR reactions: 1) Spacer with correct orientation integrated at LR, 2) Spacer with correct orientation integrated at RS, 3) Spacer with inverse orientation integrated at LR, 4) Spacer with inverse orientation integrated at RS. Plasmids containing correct (C1) or inverse (C2) orientation spacers were used as positive PCR controls, and pCR with no new spacer (C3) was used in negative PCR controls. (B) The PCR amplified integration products were separated on a 1% agarose gel in 1x TAE. Expected PCR products are 125 bp for LR integration and 162 bp for RS integration.

## Supplementary Figure S9.

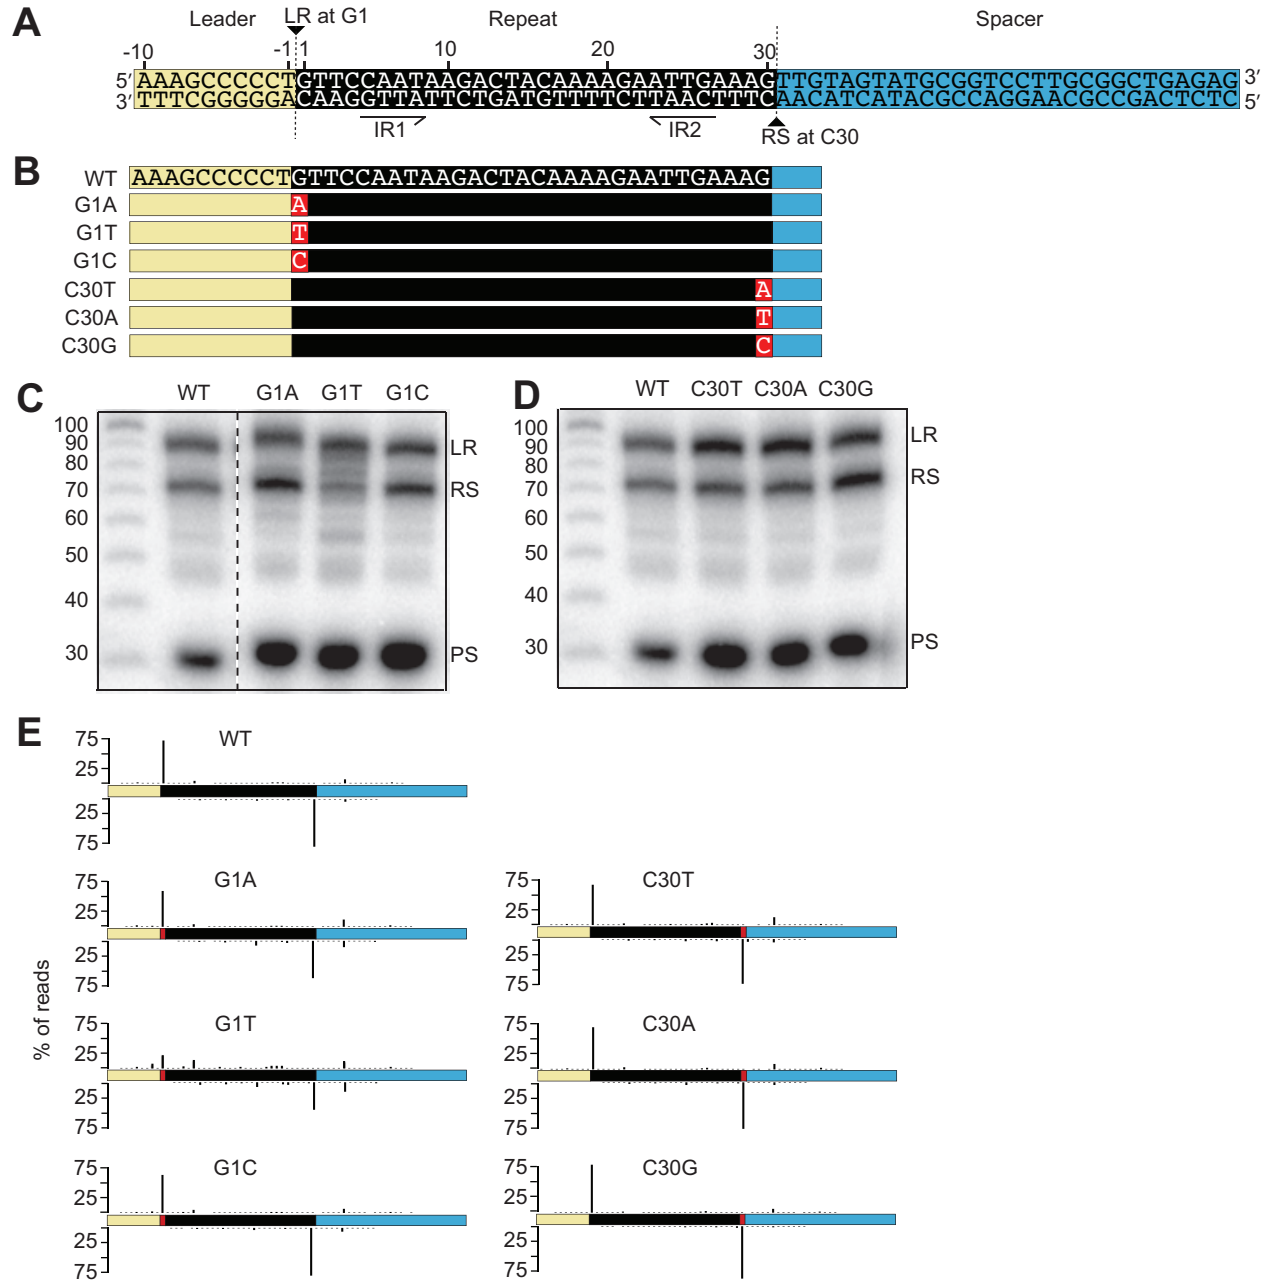

**Figure S9. Mutations to the first or last nucleotide of the repeat**

(A) Annotated sequence of minimal linear CRISPR. (B) List of substitution mutations made to the minimal CRISPR. (C, D) Integration assay comparing mutations to the (C) first and (D) last nucleotide of the repeat. Noncontiguous lanes from the same gel are indicated by dashed lines. (E) Integration sites along the minimal CRISPRs.

## Supplementary Figure S10.

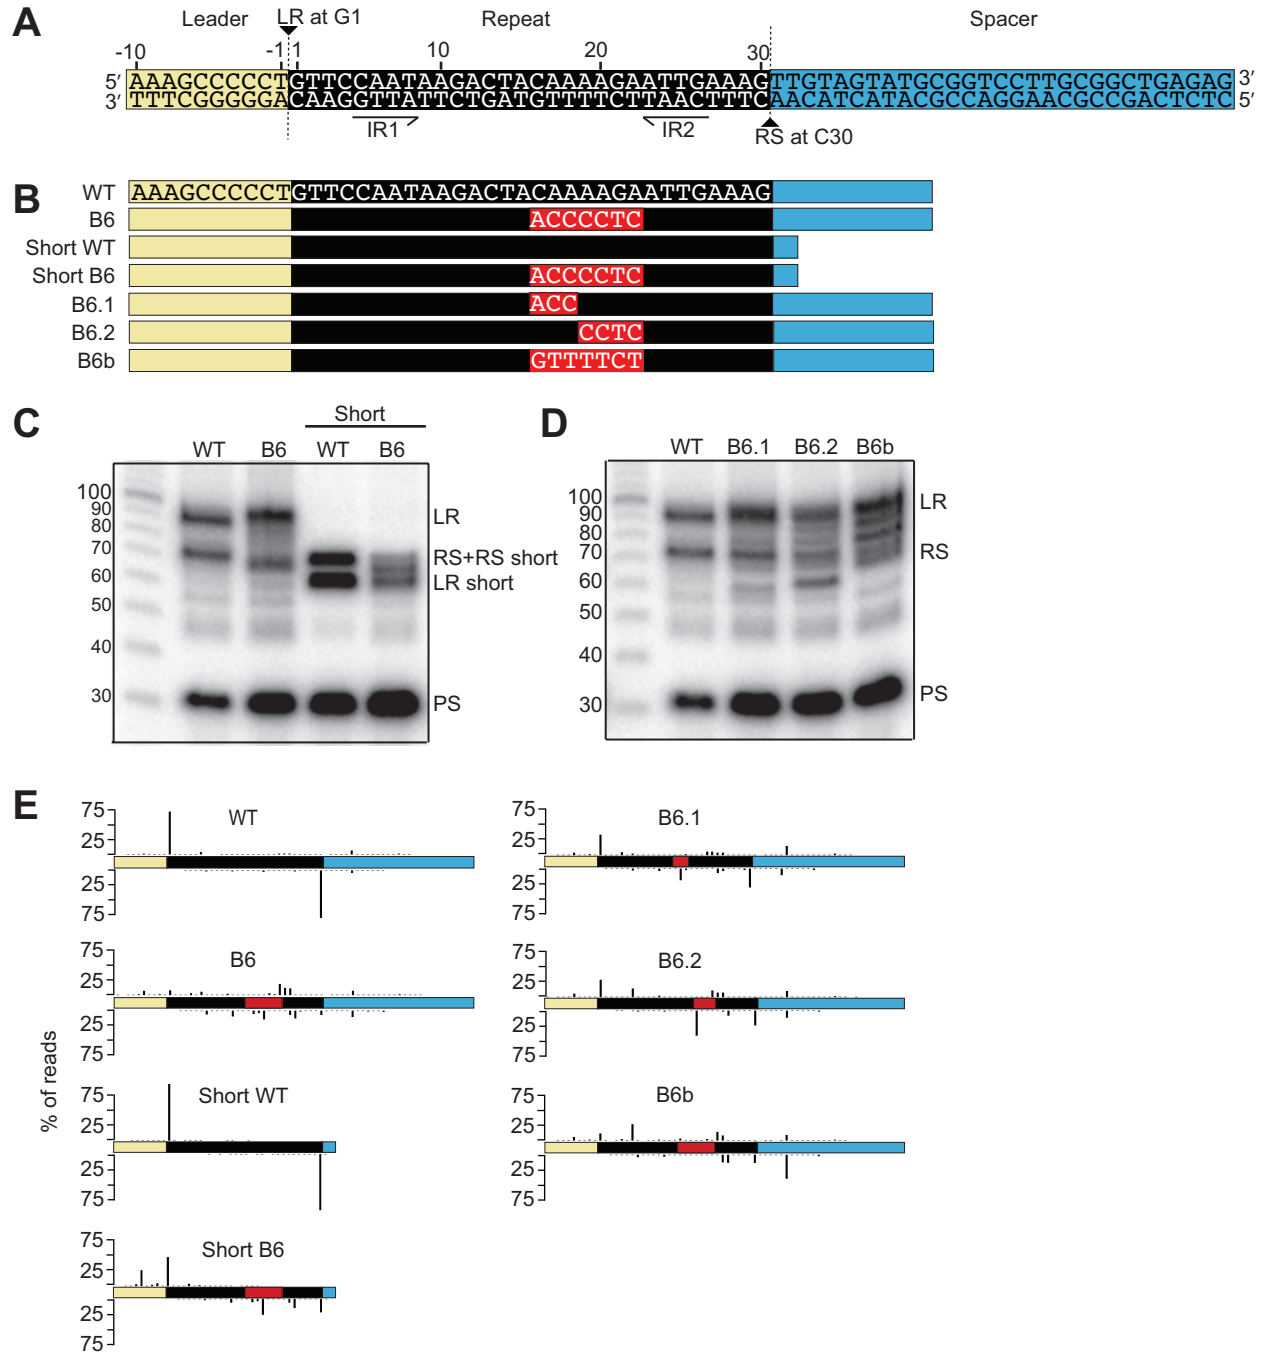

**Figure S10. Mutations made to block 6 of the repeat**

(A) Annotated sequence of minimal linear CRISPR. (B) List of substitution mutations made to the minimal CRISPR. (C) Integration assay comparing original minimal CRISPR length to a shortened minimal CRISPR to distinguish the integration products of the block 6 mutation. LR integration product of short minimal CRISPR is 64 bp. (D) Integration assay comparing alternative mutations to block 6. (E) Integration sites along the minimal CRISPRs.

## Supplementary Figure S11.

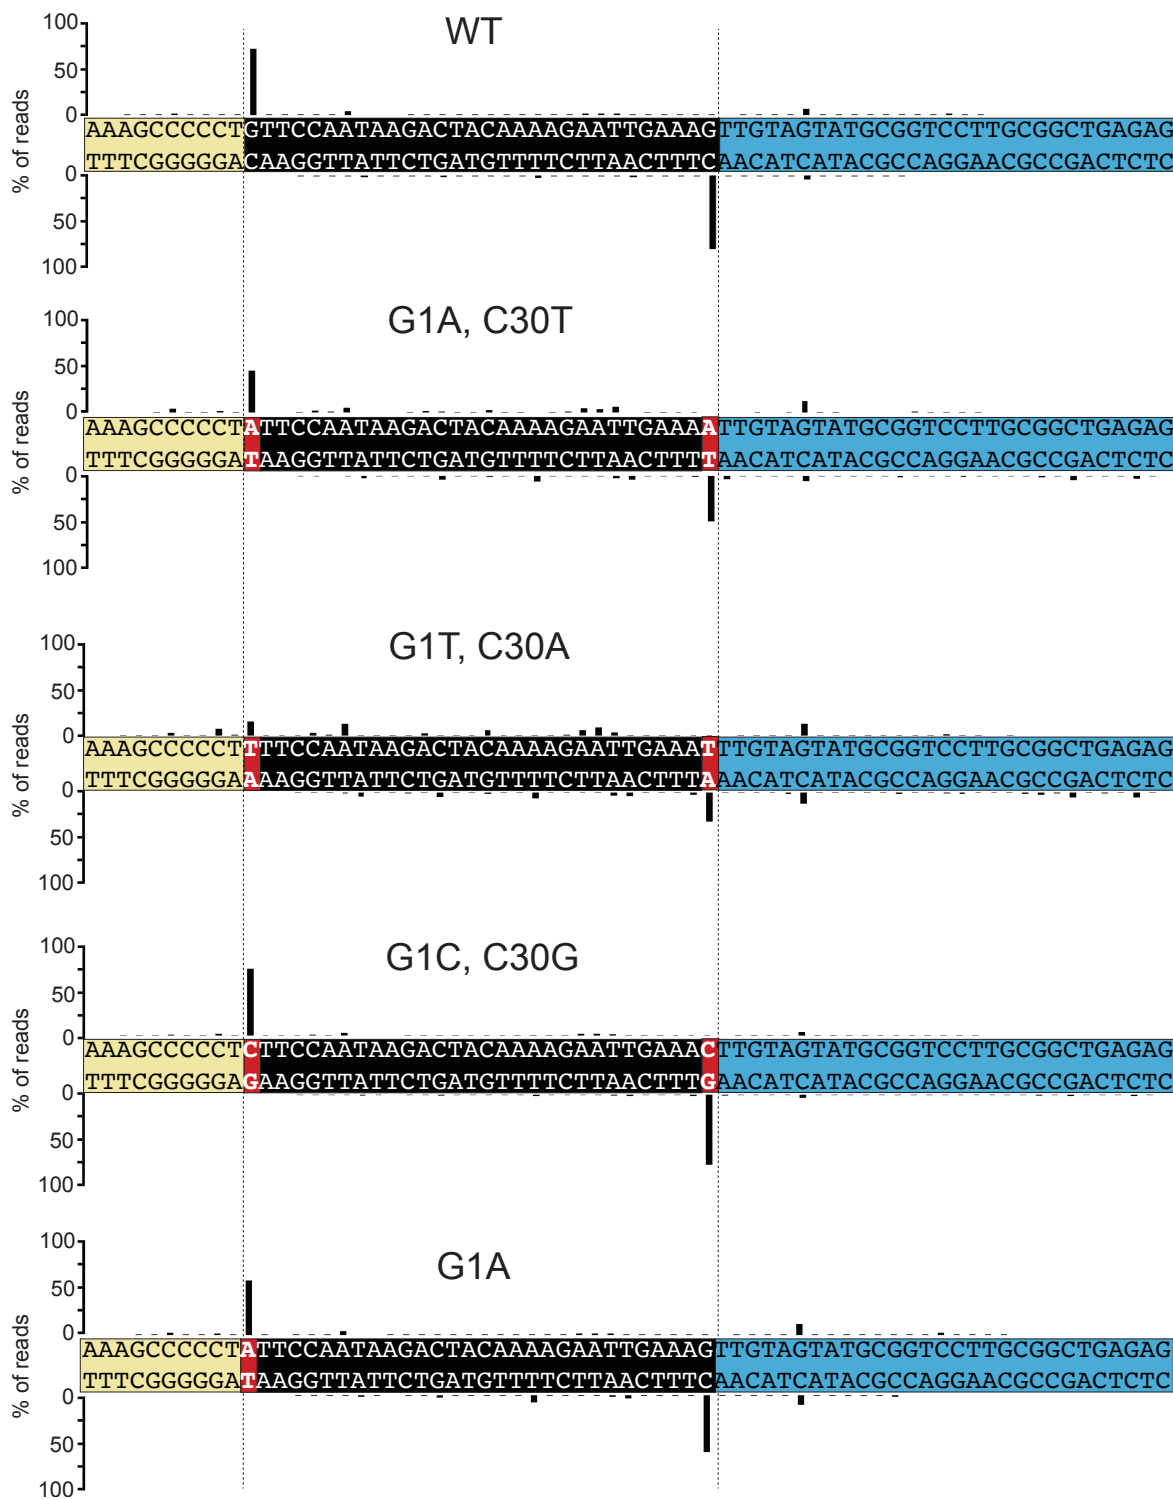

**Figure S11. Nucleotide resolution graphs displaying spacer integration sites along minimal CRISPRs used in all experiments.** Summary table of % of reads for LR and RS sites can be found in Table S2.

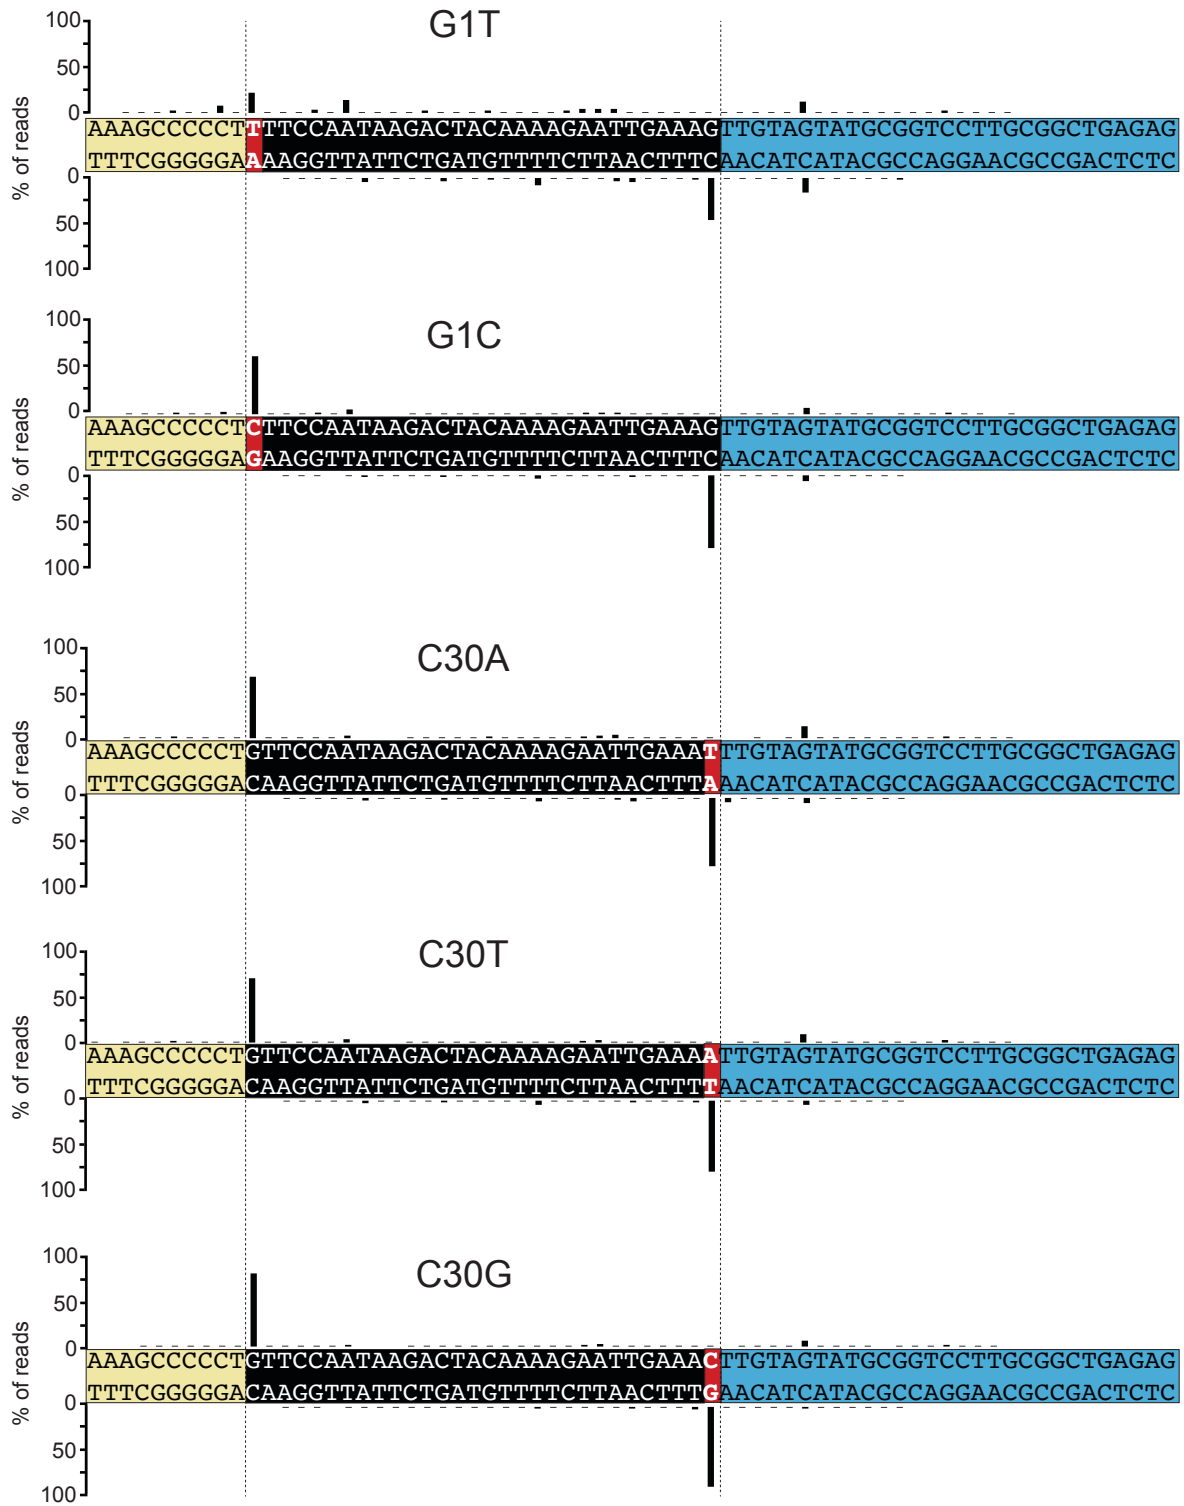

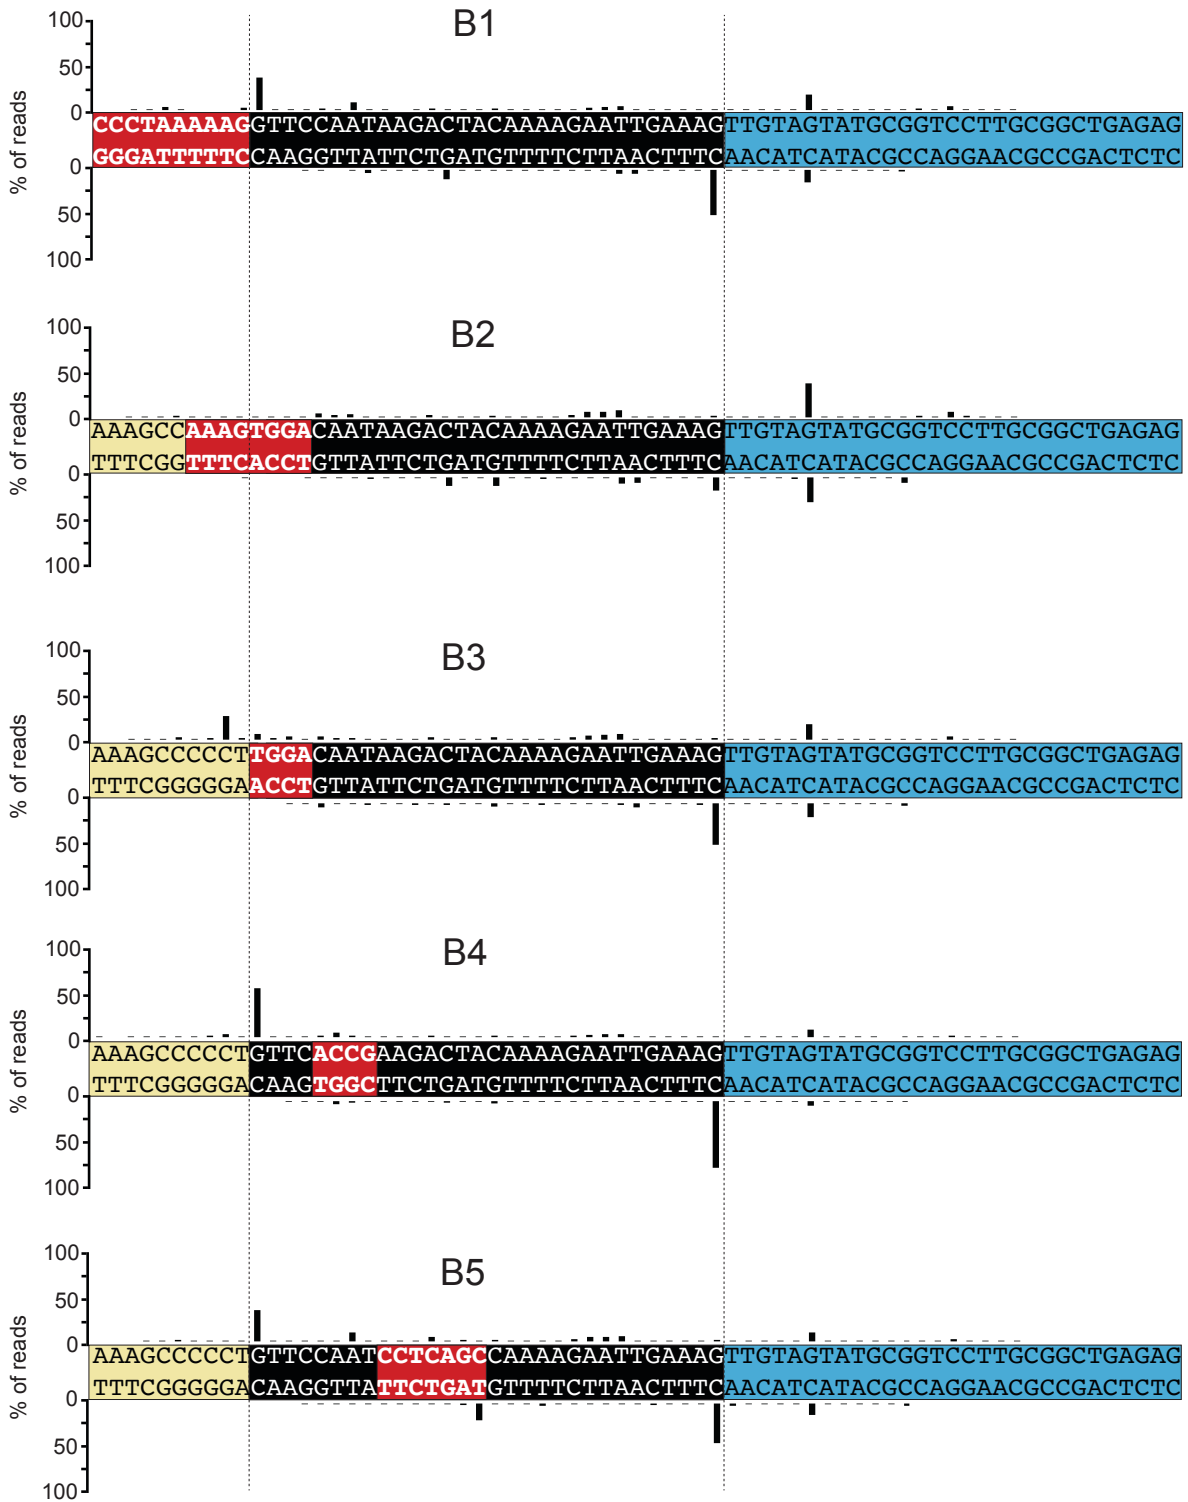

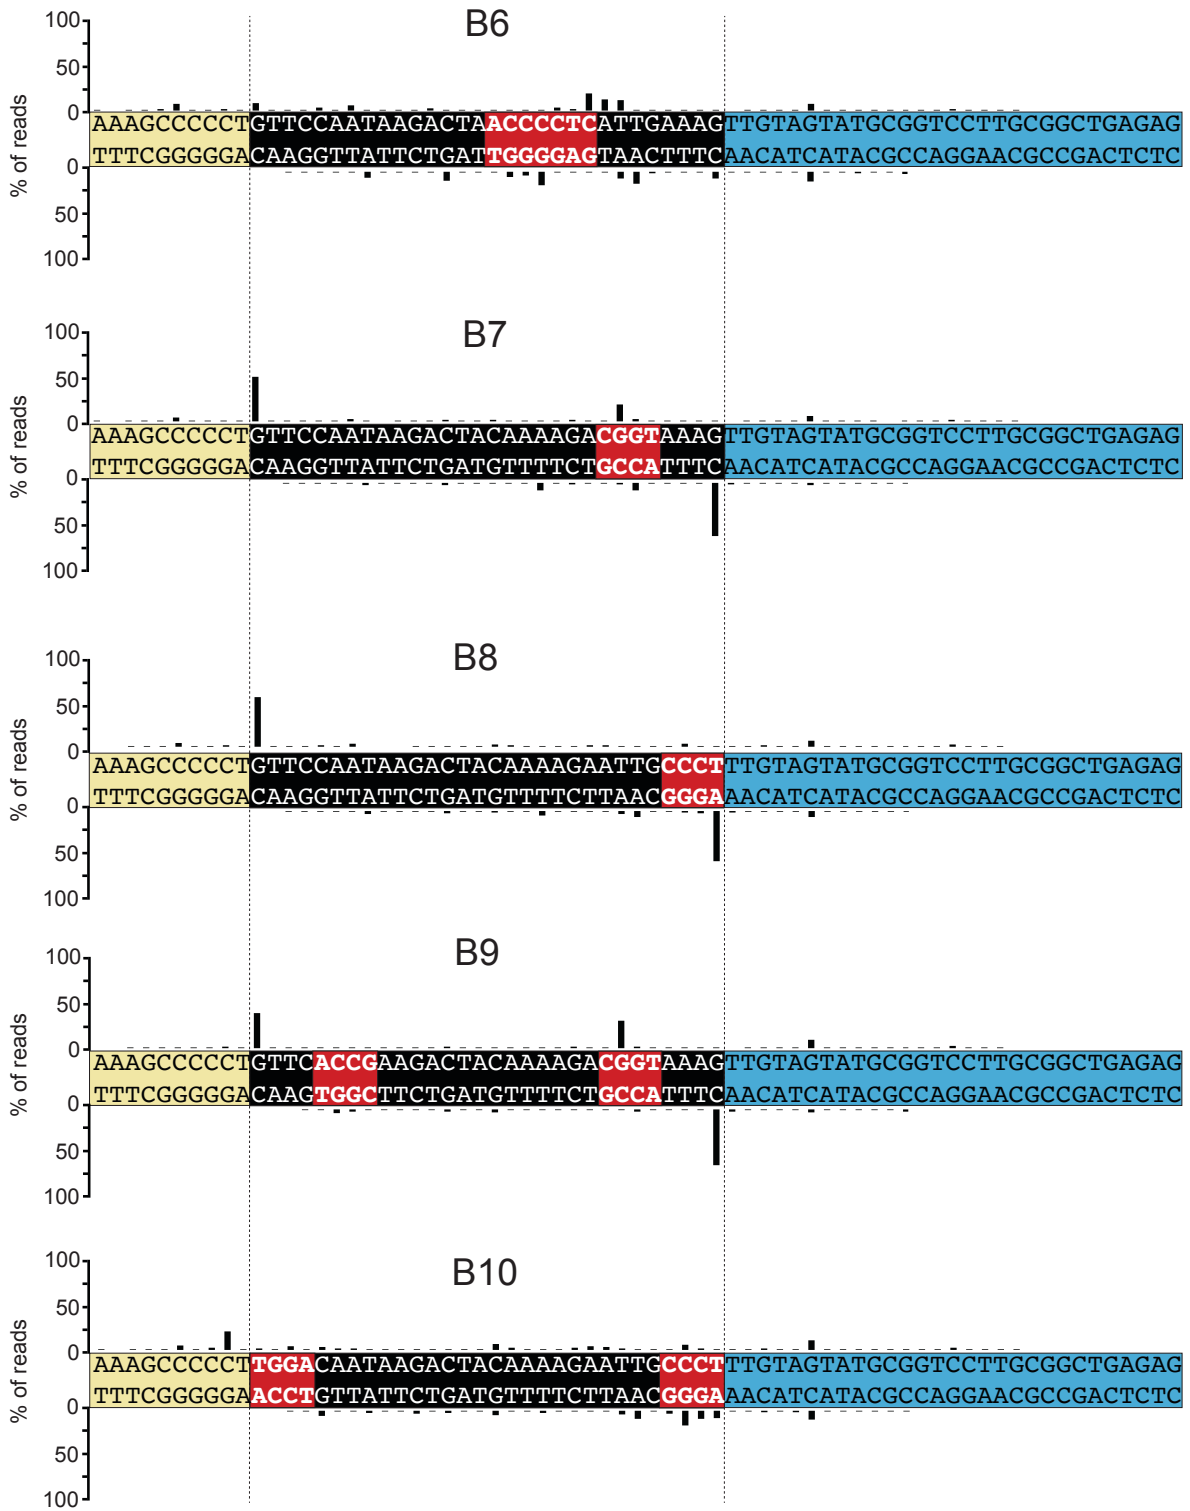



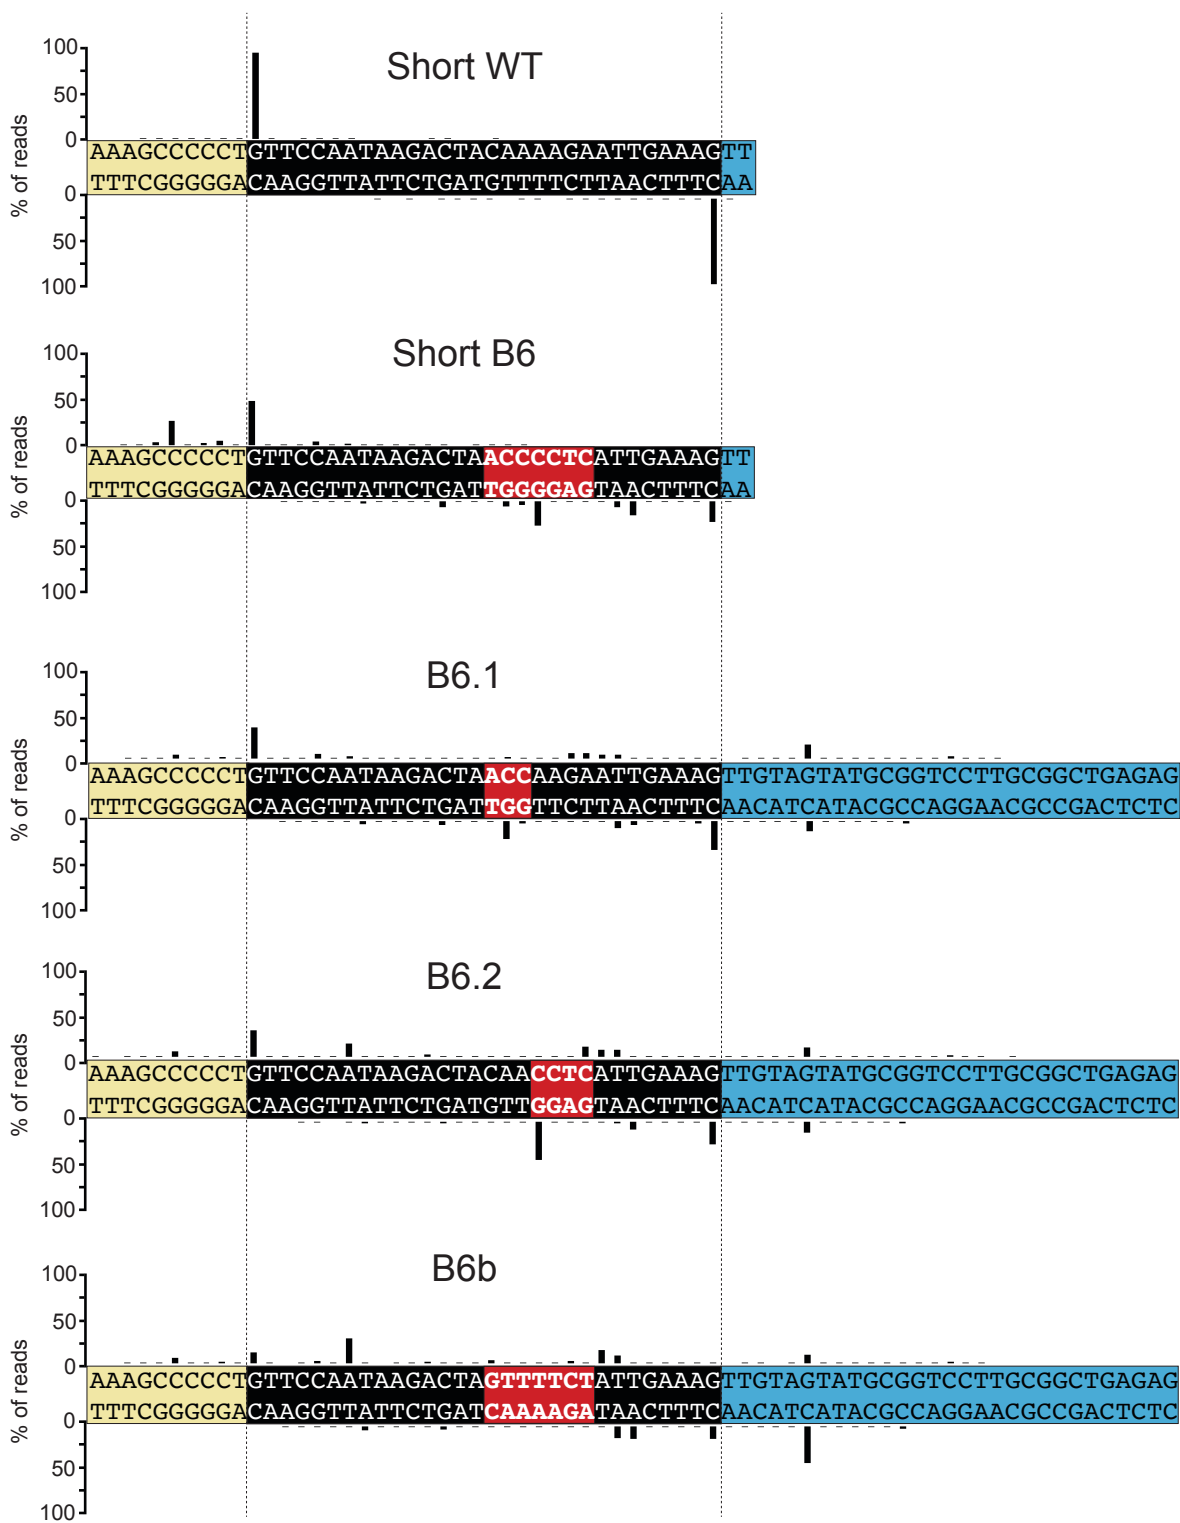

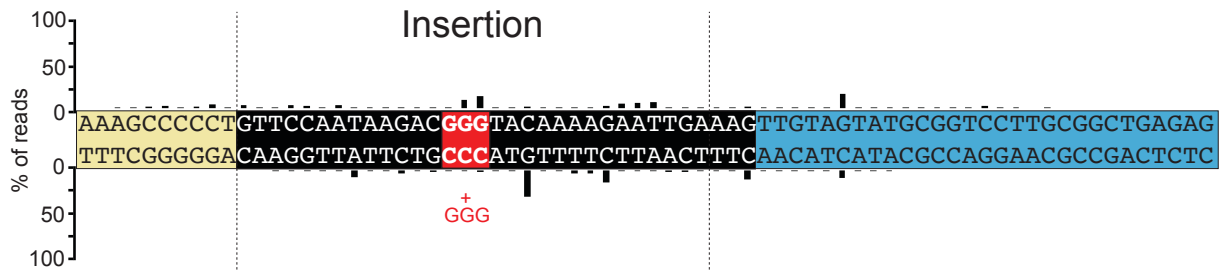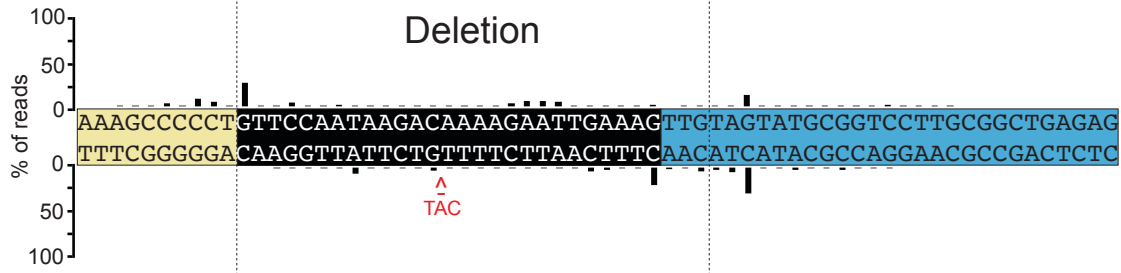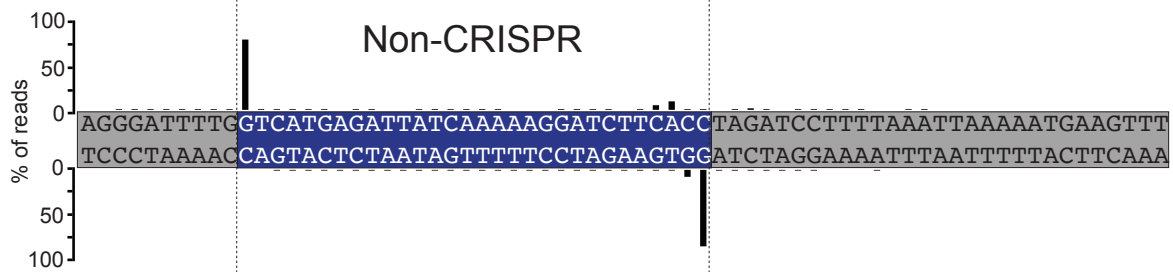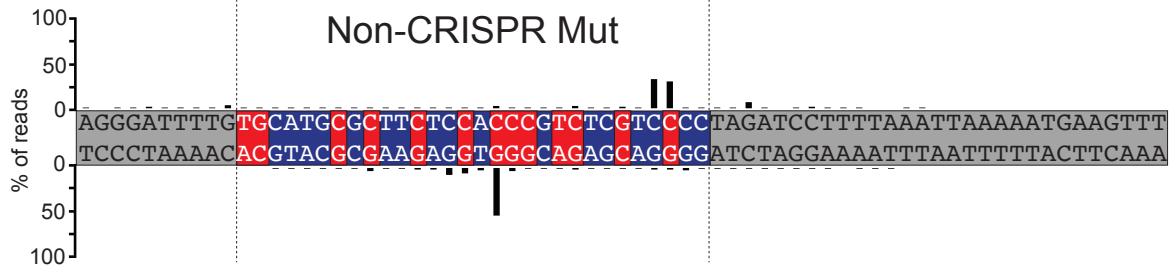

## Supplementary Table S1.

| Name                | Sequence (5'-3')                                                                                                                                                                |
|---------------------|---------------------------------------------------------------------------------------------------------------------------------------------------------------------------------|
| Pre-spacer top      | ATATAAGCAATACGGAACTTATGAGAACTATT                                                                                                                                                |
| Pre-spacer bottom   | TTCTCATAAGTTCCGTATTGCTTATATTTCAA                                                                                                                                                |
| LRS linear top      | AAAGCCCCCTGTTCCAATAAGACTACAAAAGAATTGAAAGTTGTAGTATG<br>CGGTCCCTTGC GGCTGAGAG                                                                                                     |
| LRS linear bottom   | CTCTCAGCCGCAAGGACCGCATACTACAACCTTCAATTCTTTTGTAGTCTT<br>ATTGGAACAGGGGGCTTT                                                                                                       |
| LR half-site top    | ATATAAGCAATACGGAACTTATGAGAACTATTGTTCCAATAAGACTACAAA<br>AGAATTGAAAGTTGTAGTATGCGGTCCCTTGC GGCTGAG                                                                                 |
| LR half-site leader | GGATTGGGGCAAAAAAGCCCCCT                                                                                                                                                         |
| LR half-site bottom | CTCAGCCGCAAGGACCGCATACTACAACCTTCAATTCTTTTGTAGTCTTAT<br>TGGAACAGGGGGCTTTTTTGC CCAATCC                                                                                            |
| LR half-site spacer | TTCTCATAAGTTCCGTATTGCTTATATTTCAA                                                                                                                                                |
| RS half-site top    | GGATTGGGGCAAAAAAGCCCCCTGTTCCAATAAGACTACAAAAGAATTGA<br>AAGTTGTAGTATGCGGTCCCTTGC GGCTGAG                                                                                          |
| RS half-site bottom | TTCTCATAAGTTCCGTATTGCTTATATTTCAACCTTCAATTCTTTTGTAGTC<br>TTATTGGAACAGGGGGCTTTTTTGC CCAATCC                                                                                       |
| RS half-site S1     | CTCAGCCGCAAGGACCGCATACTACAA                                                                                                                                                     |
| RS half-site spacer | ATATAAGCAATACGGAACTTATGAGAACTATT                                                                                                                                                |
| LRS spacer hairpin  | GCAAAAAAGCCCCCTGTTCCAATAAGACTACAAAAGAATTGAAAGGAGTG<br>TGCGAGGGCTTGGGCCCTGAGGTAACGTGCGATCGCACGTTACCTCAG<br>GGCCCAAGCCCTCGCACACTCCTTCAATTCTTTTGTAGTCTTATTGGAA<br>CAGGGGGCTTTTTTGC |
| LRS leader hairpin  | GCCCTCGCACACTCCTTCAATTCTTTTGTAGTCTTATTGGAACAGGGGG<br>CTTTTTGCCGATAGGCAAAAAAGCCCCCTGTTCCAATAAGACTACAAA<br>GAATTGAAAGGAGTGTCGAGGGC                                                |
| Non-CRISPR hairpin  | GTTAAGGGATTTTGGTCATGAGATTATCAAAAAGGATCTTCACCTAGATC<br>CTTTAAATCGATAGATTTAAAGGATCTAGGTGAAGATCCTTTTTGATAA<br>TCTCATGACCAAAATCCCTTAAC                                              |
| G1A, C30T top       | AAAGCCCCCTATTCCAATAAGACTACAAAAGAATTGAAATTGTAGTATGC<br>GGTCCCTTGC GGCTGAGAG                                                                                                      |
| G1A, C30T bottom    | CTCTCAGCCGCAAGGACCGCATACTACAATTTCAATTCTTTTGTAGTCTT<br>ATTGGAATAGGGGGCTTT                                                                                                        |
| G1T, C30A top       | AAAGCCCCCTTTTCCAATAAGACTACAAAAGAATTGAAATTGTAGTATGC<br>GGTCCCTTGC GGCTGAGAG                                                                                                      |
| G1T, C30A bottom    | CTCTCAGCCGCAAGGACCGCATACTACAATTTCAATTCTTTTGTAGTCTT<br>ATTGAAAAGGGGGCTTT                                                                                                         |
| G1C, C30G top       | AAAGCCCCCTCTTCCAATAAGACTACAAAAGAATTGAACTTGTAGTATG<br>CGGTCCCTTGC GGCTGAGAG                                                                                                      |
| G1C, C30G bottom    | CTCTCAGCCGCAAGGACCGCATACTACAAGTTTCAATTCTTTTGTAGTCTT<br>ATTGGAAGAGGGGGCTTT                                                                                                       |

|                |                                                                            |
|----------------|----------------------------------------------------------------------------|
| G1A top        | AAAGCCCCCTATTCCAATAAGACTACAAAAGAATTGAAAGTTGTAGTATG<br>CGGTCCTTGCGGCTGAGAG  |
| G1A bottom     | CTCTCAGCCGCAAGGACCGCATACTACAACCTTTCAATTCTTTTGTAGTCTT<br>ATTGGAATAGGGGGCTTT |
| G1T top        | AAAGCCCCCTTTTCCAATAAGACTACAAAAGAATTGAAAGTTGTAGTATGC<br>GGTCCTTGCGGCTGAGAG  |
| G1T bottom     | CTCTCAGCCGCAAGGACCGCATACTACAACCTTTCAATTCTTTTGTAGTCTT<br>ATTGAAAAGGGGGCTTT  |
| G1C top        | AAAGCCCCCTCTTCCAATAAGACTACAAAAGAATTGAAAGTTGTAGTATG<br>CGGTCCTTGCGGCTGAGAG  |
| G1C bottom     | CTCTCAGCCGCAAGGACCGCATACTACAACCTTTCAATTCTTTTGTAGTCTT<br>ATTGGAAGAGGGGGCTTT |
| C30T top       | AAAGCCCCCTGTTCCAATAAGACTACAAAAGAATTGAAAATTGTAGTATG<br>CGGTCCTTGCGGCTGAGAG  |
| C30T bottom    | CTCTCAGCCGCAAGGACCGCATACTACAATTTTCAATTCTTTTGTAGTCTT<br>ATTGGAACAGGGGGCTTT  |
| C30A top       | AAAGCCCCCTGTTCCAATAAGACTACAAAAGAATTGAAATTTGTAGTATGC<br>GGTCCTTGCGGCTGAGAG  |
| C30A bottom    | CTCTCAGCCGCAAGGACCGCATACTACAAATTTCAATTCTTTTGTAGTCTT<br>ATTGGAACAGGGGGCTTT  |
| C30G top       | AAAGCCCCCTGTTCCAATAAGACTACAAAAGAATTGAAACTTGTAGTATG<br>CGGTCCTTGCGGCTGAGAG  |
| C30G bottom    | CTCTCAGCCGCAAGGACCGCATACTACAAGTTTCAATTCTTTTGTAGTCTT<br>ATTGGAACAGGGGGCTTT  |
| Block 1 top    | CCCTAAAAAGGTTCCAATAAGACTACAAAAGAATTGAAAGTTGTAGTATG<br>CGGTCCTTGCGGCTGAGAG  |
| Block 1 bottom | CTCTCAGCCGCAAGGACCGCATACTACAACCTTTCAATTCTTTTGTAGTCTT<br>ATTGGAACCTTTTTAGGG |
| Block 2 top    | AAAGCCAAAGTGGACAATAAGACTACAAAAGAATTGAAAGTTGTAGTATG<br>CGGTCCTTGCGGCTGAGAG  |
| Block 2 bottom | CTCTCAGCCGCAAGGACCGCATACTACAACCTTTCAATTCTTTTGTAGTCTT<br>ATTGTCCACTTTGGCTTT |
| Block 3 top    | AAAGCCCCCTTGGACAATAAGACTACAAAAGAATTGAAAGTTGTAGTATG<br>CGGTCCTTGCGGCTGAGAG  |
| Block 3 bottom | CTCTCAGCCGCAAGGACCGCATACTACAACCTTTCAATTCTTTTGTAGTCTT<br>ATTGTCCAAGGGGGCTTT |
| Block 4 top    | AAAGCCCCCTGTTACCGAAGACTACAAAAGAATTGAAAGTTGTAGTATG<br>CGGTCCTTGCGGCTGAGAG   |
| Block 4 bottom | CTCTCAGCCGCAAGGACCGCATACTACAACCTTTCAATTCTTTTGTAGTCTT<br>CGGTGAACAGGGGGCTTT |
| Block 5 top    | AAAGCCCCCTGTTCCAATCCTCAGCCAAAAGAATTGAAAGTTGTAGTATG<br>CGGTCCTTGCGGCTGAGAG  |
| Block 5 bottom | CTCTCAGCCGCAAGGACCGCATACTACAACCTTTCAATTCTTTTGGCTGAG<br>GATTGGAACAGGGGGCTTT |
| Block 6 top    | AAAGCCCCCTGTTCCAATAAGACTAACCCCTCATTGAAAGTTGTAGTATG<br>CGGTCCTTGCGGCTGAGAG  |
| Block 6 bottom | CTCTCAGCCGCAAGGACCGCATACTACAACCTTTCAATGAGGGGTTAGTCT<br>TATTGGAACAGGGGGCTTT |
| Block 7 top    | AAAGCCCCCTGTTCCAATAAGACTACAAAAGACGGTAAAGTTGTAGTATG<br>CGGTCCTTGCGGCTGAGAG  |

|                          |                                                                              |
|--------------------------|------------------------------------------------------------------------------|
| Block 7 bottom           | CTCTCAGCCGCAAGGACCGCATACTACAACCTTTACCGTCTTTTGTAGTCT<br>TATTGGAACAGGGGGCTTT   |
| Block 8 top              | AAAGCCCCCTGTTCCAATAAGACTACAAAAGAATTGCCCTTTGTAGTATG<br>CGGTCCTTGCGGCTGAGAG    |
| Block 8 bottom           | CTCTCAGCCGCAAGGACCGCATACTACAAAGGGCAATTCTTTTGTAGTCT<br>TATTGGAACAGGGGGCTTT    |
| Block 9 top              | AAAGCCCCCTGTTACCGAAGACTACAAAAGACGGTAAAGTTGTAGTATG<br>CGGTCCTTGCGGCTGAGAG     |
| Block 9 bottom           | CTCTCAGCCGCAAGGACCGCATACTACAACCTTTACCGTCTTTTGTAGTCT<br>TCGGTGAACAGGGGGCTTT   |
| Block 10 top             | AAAGCCCCCTTGGACAATAAGACTACAAAAGAATTGCCCTTTGTAGTATG<br>CGGTCCTTGCGGCTGAGAG    |
| Block 10 bottom          | CTCTCAGCCGCAAGGACCGCATACTACAAAGGGCAATTCTTTTGTAGTCT<br>TATTGTCCAAGGGGGCTTT    |
| Short WT top             | AAAGCCCCCTGTTCCAATAAGACTACAAAAGAATTGAAAGTT                                   |
| Short WT bottom          | AACTTTCAATTCTTTTGTAGTCTTATTGGAACAGGGGGCTTT                                   |
| Short Block 6 top        | AAAGCCCCCTGTTCCAATAAGACTAACCCCTCATTGAAAGTT                                   |
| Short Block 6 bottom     | AACTTTCAATGAGGGGTTAGTCTTATTGGAACAGGGGGCTTT                                   |
| Block 6.1 top            | AAAGCCCCCTGTTCCAATAAGACTAACCAAGAATTGAAAGTTGTAGTATG<br>CGGTCCTTGCGGCTGAGAG    |
| Block 6.1 bottom         | CTCTCAGCCGCAAGGACCGCATACTACAACCTTTCAATTCTTGGTTAGTCT<br>TATTGGAACAGGGGGCTTT   |
| Block 6.2 top            | AAAGCCCCCTGTTCCAATAAGACTACAACCTCATTGAAAGTTGTAGTATG<br>CGGTCCTTGCGGCTGAGAG    |
| Block 6.2 bottom         | CTCTCAGCCGCAAGGACCGCATACTACAACCTTTCAATGAGGTTGTAGTCT<br>TATTGGAACAGGGGGCTTT   |
| Block 6b top             | AAAGCCCCCTGTTCCAATAAGACTAGTTTTCTATTGAAAGTTGTAGTATGC<br>GGTCCTTGCGGCTGAGAG    |
| Block 6b bottom          | CTCTCAGCCGCAAGGACCGCATACTACAACCTTTCAATAGAAAAGTCT<br>TATTGGAACAGGGGGCTTT      |
| Insertion top            | AAAGCCCCCTGTTCCAATAAGACGGGTACAAAAGAATTGAAAGTTGTAGT<br>ATGCGGTCCTTGCGGCTGAGAG |
| Insertion bottom         | CTCTCAGCCGCAAGGACCGCATACTACAACCTTTCAATTCTTTGTACCCG<br>TCTTATTGGAACAGGGGGCTTT |
| Deletion top             | AAAGCCCCCTGTTCCAATAAGACAAAAGAATTGAAAGTTGTAGTATGCGG<br>TCCTTGCGGCTGAGAG       |
| Deletion bottom          | CTCTCAGCCGCAAGGACCGCATACTACAACCTTTCAATTCTTTGTCTTATT<br>GGAACAGGGGGCTTT       |
| Non-CRISPR top           | AGGGATTTTGGTCATGAGATTATCAAAAAGGATCTTCACCTAGATCCTTTT<br>AAATTAATAATGAAGTTT    |
| Non-CRISPR bottom        | AACTTCATTTTTAATTTAAAAGGATCTAGGTGAAGATCCTTTTTGATAATC<br>TCATGACCAAAATCCCT     |
| Non-CRISPR mutant top    | AGGGATTTTGTGCATGAGCTTCTCCACCCGCTCGTCCCCTAGATCCTTT<br>TAAATTAATAATGAAGTTT     |
| Non-CRISPR mutant bottom | AACTTCATTTTTAATTTAAAAGGATCTAGGGGACGAGACGGGTGGAGAA<br>GCTCATGCACAAAATCCCT     |

## Supplementary Table S2.

| Substrate         | % total reads relative to WT |     |
|-------------------|------------------------------|-----|
|                   | LR                           | RS  |
| WT                | 100                          | 100 |
| G1A, C30T         | 65                           | 70  |
| G1T, C30A         | 23                           | 46  |
| G1C, C30G         | 108                          | 112 |
| G1A               | 84                           | 77  |
| G1T               | 30                           | 56  |
| G1C               | 89                           | 95  |
| C30T              | 87                           | 86  |
| C30A              | 94                           | 92  |
| C30G              | 106                          | 103 |
| Block 1           | 51                           | 62  |
| Block 2           | 1                            | 18  |
| Block 3           | 9                            | 56  |
| Block 4           | 79                           | 95  |
| Block 5           | 50                           | 55  |
| Block 6           | 12                           | 9   |
| Block 7           | 70                           | 76  |
| Block 8           | 80                           | 72  |
| Block 9           | 55                           | 80  |
| Block 10          | 3                            | 11  |
| Short WT          | 100                          | 100 |
| Short Block 6     | 51                           | 24  |
| Block 6.1         | 46                           | 38  |
| Block 6.2         | 40                           | 30  |
| Block 6b          | 16                           | 17  |
| Insertion         | 5                            | 2   |
| Deletion          | 37                           | 25  |
| Non-CRISPR        | 110                          | 106 |
| Non-CRISPR mutant | 0.01                         | 1   |

**Table S2.** Percent of sequencing reads occurring at leader-repeat (LR) and repeat-spacer (RS) junctions of minimal CRISPR sequences, relative to WT normalized to 100%. Substrate 'Short Block 6' is calculated relative to 'Short WT.'
